1 **Real-time structural dynamics of late steps in bacterial translation initiation**  
2 **visualized using time-resolved cryogenic electron microscopy**

3

4 Sandip Kaledhonkar<sup>1,\*</sup>, Ziao Fu<sup>2,\*</sup>, Kelvin Caban<sup>3,\*</sup>, Wen Li<sup>1</sup>, Bo Chen<sup>1</sup>, Ming Sun<sup>4</sup>, Ruben L.  
5 Gonzalez Jr<sup>3,†</sup>, Joachim Frank<sup>1,4,†</sup>

6

7 <sup>1</sup>*Department of Biochemistry & Molecular Biophysics, Columbia University, New York, NY 10032*  
8 *USA*

9 <sup>2</sup>*Integrated Program in Cellular, Molecular and Biophysical Studies, Columbia University, College*  
10 *of Physicians and Surgeons, New York, NY 10032 USA*

11 <sup>3</sup>*Department of Chemistry, Columbia University, New York, NY 10027 USA*

12 <sup>4</sup>*Department of Biological Sciences, Columbia University, New York, NY 10027 USA*

13

14 \*These authors contributed equally to this work

15

16 †To whom correspondence may be addressed: Ruben L. Gonzalez, Jr., Department of  
17 Chemistry, Columbia University, 3000 Broadway, New York, NY, 10027, USA, Tel: (212) 854-  
18 1096; FAX: (212) 932-1289; Email: [rlg2118@columbia.edu](mailto:rlg2118@columbia.edu) and Joachim Frank, Departments of  
19 Biochemistry & Molecular Biophysics and Biological Sciences, Columbia University, 650 West  
20 168 Street, New York, NY, 10032, USA, Tel.: (212) 305-9510; FAX: (212) 305-9500; Email:  
21 [jf2192@columbia.edu](mailto:jf2192@columbia.edu)

22

23 **Bacterial translation initiation entails the tightly regulated joining of the 50S**  
24 **ribosomal subunit to an initiator transfer RNA (fMet-tRNA<sup>fMet</sup>)-containing 30S ribosomal**  
25 **initiation complex (IC) to form a 70S IC that subsequently matures into a 70S elongation-**

26 **competent complex (70S EC). Rapid and accurate 70S IC formation is promoted by 30S IC-**  
27 **bound initiation factor (IF) 1 and the guanosine triphosphatase (GTPase) IF2, both of which**  
28 **must ultimately dissociate from the 70S IC before the resulting 70S EC can begin**  
29 **translation elongation<sup>1</sup>. Although comparison of 30S<sup>2-6</sup> and 70S<sup>5,7-9</sup> IC structures have**  
30 **revealed that the ribosome, IFs, and fMet-tRNA<sup>fMet</sup> can acquire different conformations in**  
31 **these complexes, the timing of conformational changes during 70S IC formation,**  
32 **structures of any intermediates formed during these rearrangements, and contributions**  
33 **that these dynamics might make to the mechanism and regulation of initiation remain**  
34 **unknown. Moreover, lack of an authentic 70S EC structure has precluded an**  
35 **understanding of ribosome, IF, and fMet-tRNA<sup>fMet</sup> rearrangements that occur upon**  
36 **maturation of a 70S IC into a 70S EC. Using time-resolved cryogenic electron microscopy**  
37 **(TR cryo-EM)<sup>10</sup> we report the first, near-atomic-resolution view of how a time-ordered**  
38 **series of conformational changes drive and regulate subunit joining, IF dissociation, and**  
39 **fMet-tRNA<sup>fMet</sup> positioning during 70S EC formation. We have found that, within ~20–80 ms,**  
40 **rearrangements of the 30S subunit and IF2, uniquely captured in its GDP•P<sub>i</sub>-bound state,**  
41 **stabilize fMet-tRNA<sup>fMet</sup> in its intermediate, ‘70S P/I’, configuration<sup>7</sup> and trigger dissociation**  
42 **of IF1 from the 70S IC. Within the next several hundreds of ms, dissociation of IF2 from the**  
43 **70S IC is coupled to further remodeling of the ribosome that positions fMet-tRNA<sup>fMet</sup> into**  
44 **its final, ‘P/P’, configuration within the 70S EC. Our results demonstrate the power of TR**  
45 **cryo-EM to determine how a time-ordered series of conformational changes contribute to**  
46 **the mechanism and regulation of one of the most fundamental processes in biology.**

47

48 Translation initiation is a fundamental step in gene expression that is essential for the  
49 overall fitness and viability of cells. In bacteria, the dynamic initiation reaction is kinetically  
50 controlled by three IFs (IF1, IF2, and IF3), which collaborate to ensure accurate selection of fMet-  
51 tRNA<sup>fMet</sup> and its pairing with the mRNA start codon<sup>11-14</sup>. Canonical initiation begins with assembly

52 of the 30S IC, followed by IF2-catalyzed joining of the 50S subunit to the 30S IC to form a 70S IC  
53 and maturation of the 70S IC into a 70S EC<sup>1,15,16</sup>. Given the essential nature of this process,  
54 structural intermediates formed during initiation in bacteria represent promising targets for the  
55 development of next-generation antibiotics<sup>4,17,18</sup>.

56 Ensemble rapid kinetic and single-molecule studies have led to the identification and  
57 characterization of several intermediate steps during the late stages of initiation. These studies  
58 have shown that subunit joining triggers rapid GTP hydrolysis by IF2<sup>1,15,19-21</sup>, dissociation of the  
59 IFs<sup>1,13,19</sup>, transition of the ribosomal subunits into their non-rotated inter-subunit orientation<sup>22,23</sup>,  
60 and accommodation of fMet-tRNA<sup>fMet</sup> into the peptidyl-tRNA binding (P) site of the peptidyl  
61 transferase center (PTC)<sup>24</sup>. In addition, structures of various 30S<sup>2-6</sup> and 70S ICs<sup>5,7-9</sup> obtained by  
62 cryogenic electron microscopy (cryo-EM) have revealed intermediate ICs that vary in the  
63 conformation of the ribosome, IFs, and fMet-tRNA<sup>fMet</sup>. Nonetheless, notable discrepancies in the  
64 inter-subunit orientation of the ribosome and position of fMet-tRNA<sup>fMet</sup> in several of the available  
65 70S IC structures have made it difficult to arrive at a consensus structural model for initiation<sup>5, 7-9</sup>.  
66 Furthermore, the 70S ICs represented by the available structures were formed using a 70S  
67 ribosome and an IF2 bound to a non-hydrolyzable GTP analog (*e.g.*, GDPNP) that results in a  
68 biochemically trapped 70S IC, rather than by mixing the 50S subunit with a 30S IC that carries a  
69 native, GTP-bound IF2 and results in the formation of a 70S IC, which subsequently matures into  
70 a 70S EC. Consequently, the available 70S IC structures do not provide information about how  
71 the various structural intermediates that have been observed evolve over the course of the  
72 initiation reaction. Therefore, these structural studies have been unable to distinguish on-pathway  
73 intermediates formed during canonical initiation from spurious, off-pathway intermediates.

74 To circumvent this problem, and to capture authentic, on-pathway intermediates that are  
75 created during canonical translation initiation, we have employed mixing-spraying-based TR cryo-  
76 EM<sup>10,25-28</sup>. Previously, we have used this TR cryo-EM method to study the association of vacant  
77 30S- and 50S subunits to form 70S ribosomes<sup>25</sup>, as well as to visualize transient structural

78 intermediates formed during the ribosome recycling process<sup>26</sup>. In the current study, we have used  
79 mixing-spraying-based TR cryo-EM to investigate the IF-catalyzed joining of the 30S IC with the  
80 50S subunit to form an authentic 70S IC that matures into a 70S EC. Using this approach, we  
81 have visualized, in real time and with near-atomic spatial resolution, the conformational  
82 rearrangements of the 30S and 70S ICs that promote and control subunit joining, IF dissociation,  
83 and fMet-tRNA<sup>fMet</sup> positioning during 70S EC formation.

84 30S ICs were assembled by combining 30S subunits, mRNA, fMet-tRNA<sup>fMet</sup>, IF1, and IF2  
85 with GTP in our optimized Tris-Polymix Buffer<sup>29</sup>. Previous ensemble rapid kinetic- and single-  
86 molecule studies have shown that IF3 dissociates prior to<sup>11</sup>, or concomitant<sup>13,30</sup> with, subunit  
87 joining in order to allow stable formation of the 70S IC and its maturation into the 70S EC<sup>16,19,30</sup>.  
88 Thus, in order to ensure that formation of the 70S IC would go to completion, IF3 was not included  
89 in the 30S IC. We began by determining whether the 30S IC was stable enough to maintain its  
90 integrity during injection into the mixing chamber and reaction channel of the mixing-spraying  
91 microfluidic chip as well as during spraying onto the EM grid. For this control experiment, the 30S  
92 IC was injected and mixed with an equal volume of Tris-Polymix Buffer lacking 50S subunits,  
93 using the microfluidic chip designed to give the longest reaction time (~600 ms), and subsequently  
94 sprayed onto an EM grid that was rapidly plunged into liquid ethane. The results of this control  
95 experiment confirmed that ~75 % of the 30S ICs remain intact during the mixing-spraying process  
96 (Extended Figure 1).

97 Ensemble rapid kinetic studies suggest that transient intermediates formed during  
98 initiation are populated on the sub-second timescale<sup>11,13,15,19-21,31</sup>. Using published rate  
99 constants<sup>19,31</sup>, we developed a kinetic model and analyzed how the populations of the expected  
100 structural species were predicted to vary as a function of time during subunit joining reactions in  
101 which 0.6  $\mu$ M 50S subunits were mixed with 1.2  $\mu$ M 30S ICs (Methods and Extended Figure 2).  
102 The analysis predicts that the population of 70S ICs carrying a GTP- or GDP•P<sub>i</sub>-bound IF2 is  
103 maximized at ~150 ms and that joining of the 50S subunit to the 30S IC to form a mature 70S EC

104 is ~65 % complete within 600 ms. Using a set of microfluidic chips designed<sup>27</sup> to provide reaction  
105 times of ~20 ms, ~80 ms, ~200 ms, and ~600 ms in our mixing-spraying TR cryo-EM apparatus  
106 (Extended Figure 3), we therefore mixed 0.6  $\mu\text{M}$  of 50S subunits with 1.2  $\mu\text{M}$  of 30S ICs and  
107 collected images at each time point. At each time point, two-dimensional (2D) classification of the  
108 images yielded 30S subunit-like, 50S subunit-like, and 70S ribosome-like particle classes.  
109 Subsequently, the particles from the ~20 ms, ~80 ms, ~200 ms, and ~600 ms time points were  
110 combined into a single dataset of 30S subunit-like, 50S subunit-like, and 70S ribosome-like  
111 particle and subjected to 3D classification (Methods and Extended Figure 4). 3D classification  
112 yielded the structures of five distinct classes: (1) a complex containing the 30S subunit, mRNA  
113 and fMet-tRNA<sup>fMet</sup>, but lacking IF1 and IF2; (2) the 30S IC; (3) the 50S subunit; (4) the 70S IC;  
114 and (5) the 70S EC. Notably, the populations of the 50S subunit, 70S IC, and 70S EC qualitatively  
115 followed the predicted kinetics (Figure 1a and Extended Figure 2), with the population of the 50S  
116 subunit decreasing as the population of the 70S EC increases from ~20 ms to ~600 ms (Extended  
117 Figure 2). Among the five particle classes that we obtained, we selected the 30S IC, 70S IC, and  
118 70S EC for further structural analysis (Figures 1b, 1c, and Figure 2a). To our knowledge, the 70S  
119 IC structure represents the first reported structure of a 70S IC obtained by mixing the 50S subunit  
120 with a 30S IC carrying a native, GTP-bound IF2, and the 70S EC structure represents the first  
121 reported structure of an authentic 70S EC. The resolutions of the 30S IC, 70S IC, and 70S EC  
122 were estimated to be 4.2 Å, 4.0 Å, and 3.9 Å, respectively, according to a resolution-estimating  
123 protocol that avoids overfitting and uses the Fourier shell correlation (FSC) with the 0.143  
124 criterion<sup>32</sup> (Extended Figure 5). Molecular Dynamics Flexible Fitting (MDFF)<sup>33</sup> was then used to  
125 generate structural models of the 30S IC and 70S IC, while rigid-body fitting of previously  
126 published structures of the 30S and 50S subunits (PDB IDs: 2AVY and 2AW4, respectively) was  
127 used to generate a structural model of the 70S EC (see Methods).

128 Analysis of the 70S ICs that are formed within the first ~20-80 ms after mixing 50S subunits  
129 with 30S ICs shows that all inter-subunit bridges are formed. Moreover, we find that IF1 has also

130 dissociated from these 70S ICs (compare Figures 2a and 2b). This observation is significant  
131 because IF1 occupies a binding site between the cleft of 16S ribosomal RNA (rRNA) helix (h) 44,  
132 h18, and ribosomal protein uS12 on the 30S subunit that enables turn 1 of IF1, comprised of  
133 residues 18-21, to establish contacts with the minor groove of h44. Consequently, dissociation of  
134 IF1 relieves a strong steric clash that would otherwise exist between turn 1 of IF1 and 23S rRNA  
135 helix (H) 69 of the 50S subunit (Figure 2c and 2d). Because inter-subunit bridge B2a is formed by  
136 an interaction between h44 and H69, dissociation of IF1 early during subunit joining enables this  
137 critically important inter-subunit bridge to be established rapidly during initial 70S IC formation.

138 By the time ~80 ms has elapsed, the population of the 70S IC has reached its maximum  
139 and by ~200 ms, IF2 has dissociated from a significant fraction of this 70S IC population, resulting  
140 in the formation of mature 70S ECs, a process that continues through the 600 msec time point  
141 and beyond. Interestingly, the 70S IC that is captured in this study by mixing 50S subunits with  
142 30S ICs carrying native, GTP-bound IF2 is in a semi-rotated inter-subunit orientation that is very  
143 similar to the orientation observed in the 70S IC reported by Allen and coworkers<sup>7</sup> and the  
144 orientation of the major population of the 70S IC reported by Sprink and coworkers (*i.e.*, 70S-IC  
145 II)<sup>9</sup>. 70S IC-bound IF2 establishes three sets of interactions with the ribosome that help lock the  
146 70S IC in the semi-rotated inter-subunit orientation. Specifically, helix 8 of IF2 interacts with the  
147 inter-subunit surface of uS12 in the 30S subunit; domain IV (dIV) of IF2 interacts with H69, H71,  
148 H89, and the loop-containing residues 77-85 of ribosomal protein uL16 of the 50S subunit; and dI  
149 of IF2 interacts with the sarcin-ricin loop (H95) of the 50S subunit (Extended Figure 6). Because  
150 the semi-rotated inter-subunit orientation of the 70S ribosome uniquely facilitates the  
151 simultaneous formation of these three sets of IF2-ribosome interactions, IF2 selectively stabilizes  
152 the 70S IC in this orientation.

153 Comparative analysis of the 30S and 70S ICs reveals subunit joining-dependent  
154 conformational changes of IF2 that facilitate formation of the 70S IC. Relative to its position on  
155 the 30S IC, dIV of IF2 is stabilized in a position that is ~10 Å closer to the 30S subunit, a structural

156 transition that eliminates a potential steric clash with H89 (Figure 2e and 2f). Furthermore, the  
157 relatively early dissociation of IF1 during 70S IC formation increases the conformational freedom  
158 of helix 8 of IF2, allowing it to acquire a position that is closer to the 50S subunit (Figure 2e).  
159 Based on previous ensemble rapid kinetic studies<sup>15,19-21</sup> demonstrating that the rate of GTP  
160 hydrolysis is relatively fast and nearly indistinguishable from the rate of initial subunit association,  
161 and that the rate of  $P_i$  release is slower than the rate of IF2 dissociation, we propose that we have  
162 uniquely captured the native, GDP• $P_i$ -form of IF2 on the 70S IC. This proposal is supported by a  
163 structural analysis demonstrating that GDP• $P_i$  more precisely models the Coulomb potential  
164 map<sup>34</sup> of the guanosine nucleotide bound to IF2 in the 70S IC than GTP does (Extended Figure  
165 7). The similarity between the conformation of the GDP• $P_i$ -form of IF2 captured here and the non-  
166 hydrolyzable GTP analog-form of IF2 reported in all of the other 70S IC structures that have been  
167 published<sup>5,7-9</sup> suggests that when IF2 hydrolyzes GTP, it does not immediately undergo a  
168 conformational change. This indicates that the transition from the 70S IC to the 70S EC is largely  
169 regulated by the release of  $P_i$  from IF2 and/or the subsequently rapid release of the GDP-form of  
170 IF2 from the 70S IC.

171 As the 70S IC matures into a 70S EC, dissociation of IF2 disrupts the IF2-ribosome  
172 interactions that stabilize the semi-rotated inter-subunit orientation of the 70S IC. Disruption of  
173 these IF2-ribosome interactions therefore triggers the reverse rotation of the 30S subunit by  $\sim 3^\circ$   
174 (Figure 3a), which allows the 70S ribosome within the 70S EC to occupy the non-rotated inter-  
175 subunit orientation. Dissociation of IF2 also disrupts the contact between DIV of IF2 and fMet-  
176 tRNA<sup>fMet</sup>, an event that, simultaneously with the reverse rotation of the 30S subunit (at least at our  
177 time resolution), enables the central domain and 3' CCA-fMet tail of fMet-tRNA<sup>fMet</sup> to move by  $\sim 28$   
178 Å and  $\sim 22$  Å, respectively, from the 70S P/I configuration of fMet-tRNA<sup>fMet</sup> that is observed in the  
179 70S IC to the P/P configuration of fMet-tRNA<sup>fMet</sup> that is observed in the 70S EC (Figure 3b, 3c,  
180 and 3d). This rearrangement of fMet-tRNA<sup>fMet</sup> is accompanied by an 'untangling' of the 3' CCA-  
181 fMet tail that allows the fMet moiety to acquire its peptidyl transfer-competent position within the

182 P site of the PTC (Figure 3c and 3d). Given the simultaneous nature of these conformational  
183 changes, at least at our time resolution, we propose that the transition of the 70S ribosome into  
184 its to non-rotated inter-subunit orientation is coupled to the rearrangement of fMet-tRNA<sup>fMet</sup> into its  
185 P/P configuration in the 70S EC along with the untangling of the 3' CCA-fMet tail and positioning  
186 of the fMet moiety into the PTC.

187 Based on our collective observations, we propose a structure-based model for the late  
188 steps of bacterial translation initiation (Figure 4). Within a time range shorter than ~20 ms after  
189 mixing 50S subunits and 30S ICs, initial association of 50S subunits to the majority of 30S ICs  
190 results in formation of 'Pre-70S ICs', that are too transient for us to observe at our current time  
191 resolution and that very rapidly either dissociate into free 50S subunits and 30S ICs<sup>13,15,16</sup> or are  
192 converted to 70S ICs. Conversion of the majority of Pre-70S ICs into 70S ICs occurs within ~20-  
193 80 ms after mixing 50S subunit and 30S ICs and begins with the rapid hydrolysis of GTP on IF2.  
194 Subsequent dissociation of IF1 enables repositioning of dIV of IF2 towards the inter-subunit face  
195 of the 30S subunit and formation of the three sets of IF2-ribosome contacts as well as the full  
196 constellation of inter-subunit bridges that allow the ribosome to stably occupy the semi-rotated  
197 inter-subunit orientation and fMet-tRNA<sup>fMet</sup> to adopt its 70S P/I configuration. The majority of the  
198 resulting 70S ICs mature into 70S ECs within the next several hundreds of ms, a process that  
199 begins with release of P<sub>i</sub> from IF2 and dissociation of the GDP-form of IF2 from the 70S IC.  
200 Dissociation of IF2 enables rotation of the ribosomal subunits into their non-rotated inter-subunit  
201 orientation, rearrangement of fMet-tRNA<sup>fMet</sup> into its P/P configuration, untangling of the 3' CCA-  
202 fMet tail of fMet-tRNA<sup>fMet</sup>, and relocation of the fMet moiety of fMet-tRNA<sup>fMet</sup> into the PTC, thereby  
203 completing 70S EC formation. Notably, we did not observe formation of the minor population of  
204 the 70S IC reported by Sprink and coworkers (*i.e.*, 70S-IC I)<sup>9</sup>, suggesting that this conformation  
205 of the 70S IC might represent an off-pathway intermediate that is formed only when the 70S IC is  
206 trapped when using the GDPNP-form of IF2 and/or prepared using a steady-state approach. In  
207 contrast, because the conformation of the 70S IC that we observe here was obtained using the



208 native, GTP-bound form of IF2 under pre-steady-state conditions, we can be certain that it  
209 represents a *bona fide* intermediate that is formed on the initiation reaction pathway.

210 In this report, we have shown how mixing-spraying TR cryo-EM is able to capture  
211 physiologically relevant, short-lived, structural intermediates in a biomolecular reaction and have  
212 used this approach to elucidate the molecular mechanism of bacterial translation. Although many  
213 biophysical and structural biological techniques can operate at higher time resolutions and/or  
214 broader timescales than mixing-spraying TR cryo-EM<sup>35</sup>, most of these techniques can only  
215 provide local-site or low-spatial-resolution information (*e.g.*, optical spectroscopies) or are  
216 otherwise limited to relatively small biomolecular systems of < 50 kDa (*e.g.*, nuclear magnetic  
217 resonance spectroscopy). In contrast, mixing-spraying TR cryo-EM is a technique that can  
218 provide complete, three-dimensional visualizations of the conformational rearrangements of large  
219 biomolecular complexes in real time and at near-atomic spatial resolution. Moreover, because it  
220 follows a pre-steady-state reaction that does not need to be inhibited by an analog of a native  
221 ligand and/or an inhibitor, one can be certain that the transient conformation(s) observed by  
222 mixing-spraying TR cryo-EM are on the reaction pathway. Mixing-spraying TR cryo-EM is a new  
223 and powerful structural biology technique that we expect will be employed to follow the formation  
224 and maturation of reaction intermediates and elucidate the molecular mechanisms of fundamental  
225 biomolecular reactions such as replication, transcription, pre-mRNA processing and splicing, and  
226 mRNA and protein degradation.

227

228 **METHODS**

229 ***Preparation and purification of IC components and assembly of the 30S IC***

230 30S and 50S subunits were purified from the MRE600 *Escherichia coli* strain as previously  
231 described, with minor modifications<sup>36</sup>. Tight-coupled 70S ribosomes were isolated by  
232 ultracentrifugation of crude ribosomes through a 10–40% sucrose density gradient prepared in  
233 Ribosome Storage Buffer (10 mM tris(hydroxymethyl)aminomethane acetate (Tris-OAc) (pH<sub>4 °C</sub> =  
234 7.5), 60 mM ammonium chloride (NH<sub>4</sub>Cl), 7.5 mM magnesium chloride (MgCl<sub>2</sub>), 0.5 mM  
235 ethylenediaminetetraacetic acid (EDTA), 6 mM 2-mercaptoethanol (BME). To maximize the purity  
236 of our tight-coupled 70S ribosomes and minimize contamination by free 50S subunits, a  
237 second round of ultracentrifugation through a 10–40% sucrose density gradient prepared in  
238 Ribosome Storage Buffer was added to our standard ribosome purification protocol. Highly pure,  
239 tight-coupled, 70S ribosomes were buffer exchanged into Ribosome Dissociation Buffer (10 mM  
240 Tris-OAc (pH<sub>4 °C</sub> = 7.5), 60 mM NH<sub>4</sub>Cl, 1 mM MgCl<sub>2</sub>, 0.5 mM EDTA, 6 mM BME) using a centrifugal  
241 filtration device (Amicon Ultra, Millipore) with a 100 KDa molecular weight cut off (MWCO) to  
242 promote the dissociation of ribosomes into 30S and 50S subunits. 30S and 50S subunits were  
243 isolated from the dissociated tight-coupled 70S ribosomes by ultracentrifugation through a 10–  
244 40% sucrose density gradient prepared in Ribosome Dissociation Buffer. To ensure high purity,  
245 30S and 50S subunits isolated from the first gradient were subjected to a second round of  
246 ultracentrifugation through a 10–40% sucrose density gradient prepared in Ribosome  
247 Dissociation Buffer. Highly purified 30S and 50S subunits were concentrated and buffer  
248 exchanged into Ribosome Storage Buffer using a centrifugal filtration device with a 100 KDa  
249 MWCO. After determining the concentration of the 30S and 50S subunits, small aliquots were  
250 prepared, flash frozen in liquid nitrogen, and stored at –80 °C.

251 The purity of our 30S and 50S subunits was confirmed by negative staining electron  
252 microscopy (EM). Briefly, one aliquot of the highly purified 30S subunits was diluted to 50 nM with  
253 Tris-Polymix Buffer (50 mM Tris-OAc (pH<sub>RT</sub> = 7.5), 100 mM potassium chloride (KCl), 5 mM

254 ammonium acetate ( $\text{NH}_4\text{OAc}$ ), 0.5 mM calcium acetate ( $\text{CaOAc}_2$ ), 5 mM magnesium acetate  
255 ( $\text{MgOAc}_2$ ), 0.1 mM EDTA, 6 mM BME, 5 mM putrescine dihydrochloride, and 1 mM spermidine,  
256 free base). Subsequently, 3  $\mu\text{l}$  of this 50 nM 30S subunit solution was applied to a carbon-coated  
257 EM grid for 30 s. Any excess sample solution was wicked away from the EM grid using filter paper,  
258 thereby generating a thin layer of sample solution on the EM grid. Following this, 3  $\mu\text{l}$  of a 2 %  
259 solution of uranium acetate in water was applied to the EM grid and the EM grid was incubated  
260 for 30 s at room temperature. Excess sample solution was wicked away from the EM grid using  
261 filter paper, once again generating a thin layer of sample solution on the EM grid. This uranium  
262 acetate, negative staining procedure was repeated two more times and, subsequently, the  
263 negatively stained 30S subunits were imaged using a 200 kV F20 cryogenic transmission electron  
264 microscope (TEM; FEI). Visual inspection of the images that were obtained revealed a highly  
265 uniform set of particles exhibiting the characteristically elongated shape of the 30S subunit,  
266 thereby demonstrating the purity of the 30S subunits. Analogous procedures were followed to  
267 load, negatively stain, and image the highly purified 50S subunits, with visual inspection of the  
268 images revealing a highly uniform set of particles exhibiting the characteristic 'crown view' of the  
269 50S subunit, thereby demonstrating the purity of the 50S subunits.

270 IF1 and the  $\gamma$ -isoform of IF2 containing tobacco etch virus (TEV) protease-cleavable, N-  
271 terminal, hexa-histidine (6 $\times$ His) tags were overexpressed in BL21(DE3) cells and purified as  
272 described previously<sup>29</sup>. Briefly, 6 $\times$ His-tagged IFs were purified by nickel nitrilotriacetic acid ( $\text{Ni}^{2+}$ -  
273 NTA) affinity chromatography using a batch-binding and elution protocol. After elution of the  
274 6 $\times$ His-tagged IFs, the 6 $\times$ His-tags were removed by adding TEV protease to the purified IFs and  
275 dialyzing-incubating the mixture overnight (~12 hr) at 4 °C against TEV Cleavage Buffer (20 mM  
276 tris(hydroxymethyl)aminomethane hydrochloride (Tris-HCl) ( $\text{pH}_{4^\circ\text{C}} = 7.5$ ), 200 mM NaCl, 0.1%  
277 Triton X-100, and 2 mM BME). IF1 was further purified on a HiLoad 16/60 Superdex 75 prep  
278 grade gel filtration column (GE Biosciences), and IF2 was further purified on a HiTrap SP HP

279 cation-exchange column (GE Biosciences). The purified IFs were concentrated and buffer  
280 exchanged into 2× Translation Factor Buffer (20 mM Tris-OAc (pH<sub>4°C</sub> = 7.5), 100 mM KCl, 20 mM  
281 MgOAc<sub>2</sub>, 10 mM BME) using a centrifugal filtration device (Amicon Ultra, Millipore) with either a  
282 3.5 KDa (IF1) or a 10 KDa (IF2) MWCO. Concentrated IFs were diluted with one volume of 100%  
283 glycerol and stored at –20 °C. Prior to using in 30S IC assembly reactions, the IFs were buffer  
284 exchanged into Tris-Polymix Buffer using either a Micro Bio-Spin 6 (IF1) or 30 (IF2) gel filtration  
285 spin column (Bio-Rad).

286 tRNA<sup>fMet</sup> (MP Biomedicals) was aminoacylated and formylated as described previously<sup>29</sup>.  
287 The yield of fMet-tRNA<sup>fMet</sup>, which was assessed by hydrophobic interaction chromatography (HIC)  
288 on a TSKgel Phenyl-5PW column (Tosoh Bioscience) as described previously<sup>29</sup>, was ~90%. The  
289 mRNA used in the 30S IC assembly reaction was chemically synthesized (Thermo Fisher) and is  
290 a non-biotinylated variant of the bacteriophage T4 gene product (gp) 32 mRNA that we have used  
291 extensively in our single-molecule fluorescence studies of initiation<sup>16,36-38</sup>. The sequence of this  
292 mRNA is 5'-CAACCUAAAACUUACACAAAUAAAAAGGAAAUAGACAU  
293 GUUCAAGUCGAAAAAUCUACUGCU-3'.

294 The 30S IC was assembled by combining 3.6 μM each of IF1, IF2 and fMet-tRNA<sup>fMet</sup>, 4.8  
295 μM of mRNA, 1 mM GTP, and 2.4 μM of 30S subunits in Tris-Polymix Buffer. The final volume of  
296 the 30S IC assembly reaction was 100 μl. IF2, which has been previously shown to protect fMet-  
297 tRNA<sup>fMet</sup> from deacylation<sup>39</sup> was added to the 30S IC assembly reaction prior to fMet-tRNA<sup>fMet</sup>. To  
298 ensure that the 30S IC assembly reaction proceeded in a native, unbiased manner, the 30S  
299 subunits were added last. Assembly reactions were incubated at 37 °C for 10 minutes, chilled on  
300 ice for 5 minutes, flash frozen in liquid nitrogen and stored at –80 °C.

301

302 ***Modeling the kinetics of subunit joining and selecting the time points for mixing-spraying***

303 ***TR cryo-EM***

304 To model the kinetics of the subunit joining reaction shown in Extended Figure 2, we used

305 initial 50S subunit and 30S IC concentrations analogous to those used in our mixing-spraying  
 306 microfluidic chip (*i.e.*, 0.6  $\mu\text{M}$  and 1.2  $\mu\text{M}$ , respectively,) and employed MATLAB to numerically  
 307 solve a set of differential equations derived from the kinetic scheme and set of rate constants  
 308 reported by Goyal and coworkers for a subunit joining reaction performed in the presence of IF1  
 309 and IF2, but in absence of the IF3<sup>19,31</sup>:

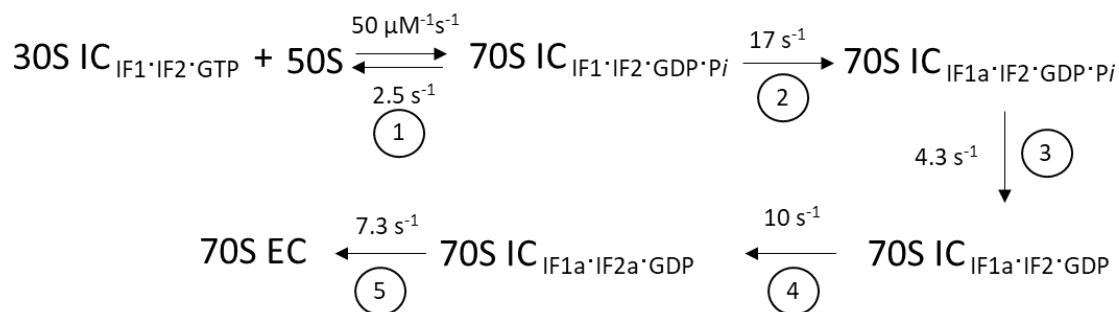

310  
 311 where  $30S\ IC_{IF1\cdot IF2\cdot GTP}$  is analogous to our 30S IC, 50S is analogous to our 50S subunit,  $70S$   
 312  $IC_{IF1\cdot IF2\cdot \text{GDP}\cdot P_i}$  is a 70S IC in which GTP has been hydrolyzed to  $\text{GDP}\cdot P_i$  on IF2,  $70S\ IC_{IF1a\cdot IF2\cdot \text{GDP}\cdot P_i}$   
 313 is a 70S IC in which IF1 and/or some other component of the 70S IC has undergone a  
 314 conformational change,  $70S\ IC_{IF1a\cdot IF2\cdot \text{GDP}}$  is a 70S IC in which  $P_i$  has been released from IF2,  $70S$   
 315  $IC_{IF1a\cdot IF2a\cdot \text{GDP}}$  is a 70S IC in which IF2 has undergone a conformational change, and 70S EC is  
 316 analogous to our 70S EC. Because of the likelihood that we would not be able to structurally  
 317 distinguish  $70S\ IC_{IF1\cdot IF2\cdot \text{GDP}\cdot P_i}$ ,  $70S\ IC_{IF1a\cdot IF2\cdot \text{GDP}\cdot P_i}$ ,  $70S\ IC_{IF1a\cdot IF2\cdot \text{GDP}}$ , and  $70S\ IC_{IF1a\cdot IF2a\cdot \text{GDP}}$  at our  
 318 expected spatial and/or temporal resolutions, we summed the concentrations of these four  
 319 complexes to generate the grey curve representing the 70S IC in Extended Figure 2. The modeled  
 320 kinetics predict that the population of 70S ICs should peak within 50–250 ms after mixing of the  
 321 50S subunit and 30S IC and that these 70S ICs should mature to a significant population of 70S  
 322 ECs within the next several hundreds of ms. Thus, to ensure that we would capture formation of  
 323 the 70S IC and its maturation to the 70S EC, we selected microfluidic chips designed to provide  
 324 reaction times of ~20 ms, ~80 ms, ~200 ms, and ~600 ms.

325

### 326 ***Preparation of EM grids and mixing-spraying TR cryo-EM***

327 Quantifoil R1.2/1.3 grids with a 300 mesh size were subjected to glow discharge in H<sub>2</sub> and  
328 O<sub>2</sub> for 25 s using a Solarus 950 plasma cleaning system (Gatan) set to a power of 25 W. For each  
329 of the four time points, 1.2 μM of 50S subunit in Tris-Polymix Buffer and 2.4 μM of 30S IC in Tris-  
330 Polymix Buffer were injected into the corresponding microfluidic chip at a rate of 3 μl s<sup>-1</sup> such that  
331 they could be mixed and sprayed onto a glow-discharged grid as previously described<sup>25</sup>. The final  
332 concentration of the 50S subunit and the 30S IC after rapid mixing in our microfluidic chip was  
333 0.6 μM and 1.2 μM, respectively. As the mixture was sprayed onto the grid, the grid was plunge-  
334 frozen in liquid ethane and stored in liquid nitrogen until it was ready to be imaged.

335

### 336 ***Cryo-EM data collection***

337 Plunge-frozen grids were imaged with a 300 kV Tecnai Polara F30 TEM (FEI). The images  
338 were recorded at a defocus range of 1-3 μm on a K2 direct detector camera (Gatan) operating in  
339 counting mode with an effective magnification of 29,000× at 1.66 Å pixel<sup>-1</sup>. A total of 40 frames  
340 were collected with an electron dose of 8 e<sup>-</sup> pixel<sup>-1</sup> s<sup>-1</sup> for each image.

341

### 342 ***Cryo-EM data processing***

343 A flow-chart of the data processing procedure detailed here is given in Extended Figure  
344 4. The beam-induced motion of the sample captured by the images was corrected using the  
345 MotionCor2 software program<sup>40</sup>. The contrast transfer function (CTF) of each micrograph was  
346 estimated using the CTFFIND4 software program<sup>41</sup>. Imaged particles were picked using the  
347 Autopicker algorithm included in the RELION 2.0 software program<sup>42</sup>. For each time point, 2D  
348 classification of the recorded images was used to separate 30S subunit-like, 50S subunit-like,  
349 and 70S ribosome-like particles from ice-like and/or debris-like particles picked by the Autopicker  
350 algorithm and to classify the 298K particles that were picked for further analysis into 30S subunit-  
351 like, 50S subunit-like, and 70S ribosome-like particle classes. These particle classes were then

352 combined into a single dataset of 30S subunit-like, 50S subunit-like, and 70S ribosome-like  
353 particles and subjected to a round of 3D classification using 4× binning of the images to more  
354 finely separate 30S subunit-like particles from 50S subunit-like and 70S ribosome-like particles.  
355 After the first round of 3D classification, two particle sets were created in which the first particle  
356 set encompassed 150K 30S subunit-like particles and the second particle set encompassed 98K  
357 combined 50S subunit-like and 70S ribosome-like particles. These two particle sets were  
358 extracted using 2× binning of the images.

359 The first particle set, containing 150K particles, was subjected to a second round of 3D  
360 classification from which we then obtained two major subclasses in which the first subclass  
361 encompassed 86K 30S ICs and 64K 30S subunits carrying only a P-site fMet-tRNA<sup>fMet</sup> (or, more  
362 likely, a mixture of fMet-tRNA<sup>fMet</sup> and deacylated tRNA<sup>fMet</sup>) in the 70S P/I configuration. The  
363 subclass containing the 30S IC was further refined without binning the images. The resolution of  
364 the refined 30S IC was estimated to be 4.2 Å using a resolution-estimating protocol that avoids  
365 overfitting and uses the FSC with the 0.143 criterion<sup>32</sup>.

366 The second particle set, containing 98K combined 50S subunit-like and 70S ribosome-like  
367 particles, was also subjected to a second round of 3D classification from which we then obtained  
368 two major subclasses in which the first subclass encompassed 21K 50S subunits and the second  
369 subclass encompassed 77K 70S ribosome-like particles. This second round of 3D classification  
370 was repeated three times to estimate the errors associated with the 3D classification-based  
371 division of the 50S subunit and 70S ribosome-like particle populations (Table 1). At this point in  
372 the analysis, each 50S subunit and 70S ribosome-like particle was traced back to the time point  
373 from which it originated to determine the 50S subunit and 70S ribosome-like particle populations  
374 at each time point. The 70S ribosome-like subclass was then subjected to a third round of 3D  
375 classification from which we then obtained two major sub-subclasses in which the first sub-  
376 subclass encompassed 27K 70S ICs and the second sub-subclass encompassed 50K 70S ECs.

377 Again, this third round of 3D classification was repeated three times in order to estimate the errors  
378 associated with the 3D classification-based division of the 70S IC and 70S EC populations (Table  
379 1). The subclass containing the 50S subunit and the sub-subclasses containing the 70S IC and  
380 70S EC were then further refined without binning the images. The resolutions of the refined 70S  
381 IC and 70S EC were estimated to be 4.0 Å and 3.9 Å, respectively, using a resolution-estimating  
382 protocol that avoids overfitting and uses the FSC with the 0.143 criterion<sup>32</sup>.

383

### 384 ***Assessing the integrity of the 30S IC during mixing-spraying TR cryo-EM***

385 To assess whether the 30S IC was stable enough to maintain its integrity during mixing-  
386 spraying TR cryo-EM, 2.4 μM of 30S IC in Tris-Polymix Buffer and an equal volume of Tris-  
387 Polymix Buffer lacking 50S subunits were injected into the microfluidic chip designed to give the  
388 longest reaction time (~600 ms), mixed, and sprayed onto an EM grid as the grid was plunge-  
389 frozen in liquid ethane and subsequently stored in liquid nitrogen, all as described above. When  
390 ready, the plunge-frozen grid was imaged with the 300 kV Tecnai Polara F30 TEM (FEI), as  
391 described above. Subsequently, 2D classification was used to select 30S subunit-like particles.  
392 The selected particles were then subjected to 3D classification, which showed that ~75% of the  
393 30S subunit-like particles were 30S ICs and ~25 % of the 30S subunit-like particles were 30S  
394 subunits carrying a P-site fMet-tRNA<sup>fMet</sup> (or, more likely, a mixture of fMet-tRNA<sup>fMet</sup> and deacylated  
395 tRNA<sup>fMet</sup>) in its '30S P/I' configuration (Extended Figure 1). The results of this experiment  
396 demonstrate that the majority of the 30S IC remains intact during injection and mixing in the  
397 microfluidic chip and spraying onto the EM grid.

398

### 399 ***Modeling of the 30S IC, 70S IC, and 70S EC structures***

400 We obtained near-atomic resolution models of the 30S IC and 70S IC by employing the  
401 Molecular Dynamics Flexible Fitting (MDFF) method<sup>33</sup> (Extended Figure 8) and using a near-  
402 atomic-resolution cryo-EM model of a 70S IC (PDB ID: 3JCJ) as the initial starting model.



403 Similarly, we obtained an initial, near-atomic resolution model of the 70S EC using rigid-body  
404 fitting within the UCSF Chimera software program<sup>43</sup> and atomic-resolution models of 70S  
405 ribosomes in the non-rotated inter-subunit orientation and lacking any tRNA or mRNA ligands  
406 (PDB IDs: 2AVY and 2AW4). This initial, near-atomic-resolution model of the 70S EC was further  
407 refined by subjecting it to the 'jiggle fit' algorithm within the COOT software program<sup>44</sup> to obtain  
408 the final atomic coordinates.

409

#### 410 **DATA AVAILABILITY**

411 The data that support the findings of this study are available from the corresponding author  
412 upon request.

413 **REFERENCES**

- 414 1. Antoun, A., Pavlov, M.Y., Andersson, K., Tenson, T. & Ehrenberg, M. The roles of initiation  
415 factor 2 and guanosine triphosphate in initiation of protein synthesis. *Embo Journal* **22**,  
416 5593-5601 (2003).
- 417 2. Hussain, T., Llacer, J.L., Wimberly, B.T., Kieft, J.S. & Ramakrishnan, V. Large-Scale  
418 Movements of IF3 and tRNA during Bacterial Translation Initiation. *Cell* **167**, 133-+ (2016).
- 419 3. Julian, P. et al. The Cryo-EM Structure of a Complete 30S Translation Initiation Complex  
420 from Escherichia coli. *Plos Biology* **9** (2011).
- 421 4. Lopez-Alonso, J.P. et al. Structure of a 30S pre-initiation complex stalled by GE81112  
422 reveals structural parallels in bacterial and eukaryotic protein synthesis initiation  
423 pathways. *Nucleic Acids Research* **45**, 2179-2187 (2017).
- 424 5. Simonetti, A. et al. Involvement of protein IF2 N domain in ribosomal subunit joining  
425 revealed from architecture and function of the full-length initiation factor. *Proceedings of*  
426 *the National Academy of Sciences of the United States of America* **110**, 15656-15661  
427 (2013).
- 428 6. Simonetti, A. et al. Structure of the 30S translation initiation complex. *Nature* **455**, 416-  
429 U73 (2008).
- 430 7. Allen, G.S., Zavialov, A., Gursky, R., Ehrenberg, M. & Frank, J. The cryo-EM structure of  
431 a translation initiation complex from Escherichia coli. *Cell* **121**, 703-712 (2005).
- 432 8. Myasnikov, A.G. et al. Conformational transition of initiation factor 2 from the GTP- to  
433 GDP-bound state visualized on the ribosome. *Nature Structural & Molecular Biology* **12**,  
434 1145-1149 (2005).
- 435 9. Sprink, T. et al. Structures of ribosome-bound initiation factor 2 reveal the mechanism of  
436 subunit association. *Science Advances* **2** (2016).
- 437 10. Frank, J. Time-resolved cryo-electron microscopy: Recent progress. *Journal of Structural*  
438 *Biology* **200**, 303-306 (2017).

- 439 11. Antoun, A., Pavlov, M.Y., Lovmar, M. & Ehrenberg, M. How initiation factors maximize the  
440 accuracy of tRNA selection in initiation of bacterial protein synthesis. *Molecular Cell* **23**,  
441 183-193 (2006).
- 442 12. Caban, K. & Gonzalez, R.L. The emerging role of rectified thermal fluctuations in initiator  
443 aa-tRNA- and start codon selection during translation initiation. *Biochimie* **114**, 30-38  
444 (2015).
- 445 13. Milon, P., Konevega, A.L., Gualerzi, C.O. & Rodnina, M.V. Kinetic checkpoint at a late  
446 step in translation initiation. *Molecular Cell* **30**, 712-720 (2008).
- 447 14. Milon, P. & Rodnina, M.V. Kinetic control of translation initiation in bacteria. *Critical*  
448 *Reviews in Biochemistry and Molecular Biology* **47**, 334-348 (2012).
- 449 15. Grigoriadou, C., Marzi, S., Kirillov, S., Gualerzi, C.O. & Cooperman, B.S. A quantitative  
450 kinetic scheme for 70 S translation initiation complex formation. *Journal of Molecular*  
451 *Biology* **373**, 562-572 (2007).
- 452 16. MacDougall, D.D. & Gonzalez, R.L. Translation Initiation Factor 3 Regulates Switching  
453 between Different Modes of Ribosomal Subunit Joining. *Journal of Molecular Biology* **427**,  
454 1801-1818 (2015).
- 455 17. Gualerzi, C.O. & Pon, C.L. Initiation of mRNA translation in bacteria: structural and  
456 dynamic aspects. *Cellular and Molecular Life Sciences* **72**, 4341-4367 (2015).
- 457 18. Wilson, D.N. Ribosome-targeting antibiotics and mechanisms of bacterial resistance.  
458 *Nature Reviews Microbiology* **12**, 35-48 (2014).
- 459 19. Goyal, A., Belardinelli, R., Maracci, C., Milon, P. & Rodnina, M.V. Directional transition  
460 from initiation to elongation in bacterial translation. *Nucleic Acids Research* **43** (2015).
- 461 20. Huang, C.H., Mandava, C.S. & Sanyal, S. The Ribosomal Stalk Plays a Key Role in IF2-  
462 Mediated Association of the Ribosomal Subunits. *Journal of Molecular Biology* **399**, 145-  
463 153 (2010).
- 464 21. Tomsic, J. et al. Late events of translation initiation in bacteria: a kinetic analysis. *Embo*

- 465 *Journal* **19**, 2127-2136 (2000).
- 466 22. Ling, C. & Ermolenko, D.N. Initiation factor 2 stabilizes the ribosome in a semirotated  
467 conformation. *Proceedings of the National Academy of Sciences of the United States of*  
468 *America* **112**, 15874-15879 (2015).
- 469 23. Marshall, R.A., Aitken, C.E. & Puglisi, J.D. GTP Hydrolysis by IF2 Guides Progression of  
470 the Ribosome into Elongation. *Molecular Cell* **35**, 37-47 (2009).
- 471 24. LaTeana, A., Pon, C.L. & Gualerzi, C.O. Late events in translation initiation. Adjustment  
472 of fMet-tRNA in the ribosomal P-site. *Journal of Molecular Biology* **256**, 667-675 (1996).
- 473 25. Chen, B. et al. Structural Dynamics of Ribosome Subunit Association Studied by Mixing-  
474 Spraying Time-Resolved Cryogenic Electron Microscopy. *Structure* **23**, 1097-1105 (2015).
- 475 26. Fu, Z. et al. Key Intermediates in Ribosome Recycling Visualized by Time-Resolved  
476 Cryoelectron Microscopy. *Structure* **24**, 2092-2101 (2016).
- 477 27. Lu, Z. et al. Monolithic microfluidic mixing-spraying devices for time-resolved cryo-electron  
478 microscopy. *Journal of Structural Biology* **168**, 388-395 (2009).
- 479 28. Shaikh, T.R. et al. Initial bridges between two ribosomal subunits are formed within 9.4  
480 milliseconds, as studied by time-resolved cryo-EM. *Proceedings of the National Academy*  
481 *of Sciences* (2014).
- 482 29. Fei, J.Y. et al. A Highly Purified, Fluorescently Labeled in Vitro Translation System for  
483 Single-Molecule Studies of Protein Synthesis. *Methods in Enzymology, Vol 472: Single*  
484 *Molecule Tools, Pt A: Fluorescence Based Approaches* **472**, 221-259 (2010).
- 485 30. Grigoriadou, C., Marzi, S., Pan, D., Gualerzi, C.O. & Cooperman, B.S. The translational  
486 fidelity function of IF3 during transition from the 30 S initiation complex to the 70 S initiation  
487 complex. *Journal of Molecular Biology* **373**, 551-561 (2007).
- 488 31. Goyal, A. Monitoring the late events of translation initiation in real-time, Doctoral  
489 Dissertation, (Georg-August University Göttingen, Göttingen, 2015).
- 490 32. Chen, S.X. et al. High-resolution noise substitution to measure overfitting and validate

- 491 resolution in 3D structure determination by single particle electron cryomicroscopy.  
492 *Ultramicroscopy* **135**, 24-35 (2013).
- 493 33. Trabuco, L.G., Villa, E., Mitra, K., Frank, J. & Schulten, K. Flexible fitting of atomic  
494 structures into electron microscopy maps using molecular dynamics. *Structure* **16**, 673-  
495 683 (2008).
- 496 34. Wang, J., Liu, Z., Frank, J. & Moore, P.B. Identification of ions in experimental electrostatic  
497 potential maps. *IUCrJ* **5**, 375-381 (2018).
- 498 35. Henzler-Wildman, K. & Kern, D. Dynamic personalities of proteins. *Nature* **450**, 964-972  
499 (2007).
- 500 36. Caban, K., Pavlov, M., Ehrenberg, M. & Gonzalez, R.L. A conformational switch in  
501 initiation factor 2 controls the fidelity of translation initiation in bacteria. *Nature*  
502 *Communications* **8** (2017).
- 503 37. Wang, J., Caban, K. & Gonzalez, R.L., Jr. Ribosomal initiation complex-driven changes in  
504 the stability and dynamics of initiation factor 2 regulate the fidelity of translation initiation.  
505 *J Mol Biol* **427**, 1819-34 (2015).
- 506 38. Elvekrog, M.M. & Gonzalez, R.L., Jr. Conformational selection of translation initiation  
507 factor 3 signals proper substrate selection. *Nat Struct Mol Biol* **20**, 628-33 (2013).
- 508 39. Guenneugues, M. et al. Mapping the fMet-tRNA(f)(Met) binding site of initiation factor IF2.  
509 *EMBO J* **19**, 5233-40 (2000).
- 510 40. Zheng, S.Q. et al. MotionCor2: anisotropic correction of beam-induced motion for  
511 improved cryo-electron microscopy. *Nature Methods* **14**, 331-332 (2017).
- 512 41. Rohou, A. & Grigorieff, N. CTFFIND4: Fast and accurate defocus estimation from electron  
513 micrographs. *Journal of Structural Biology* **192**, 216-221 (2015).
- 514 42. Scheres, S.H.W. RELION: Implementation of a Bayesian approach to cryo-EM structure  
515 determination. *Journal of Structural Biology* **180**, 519-530 (2012).
- 516 43. Pettersen, E.F. et al. UCSF chimera - A visualization system for exploratory research and

- 517 analysis. *Journal of Computational Chemistry* **25**, 1605-1612 (2004).
- 518 44. Emsley, P. & Cowtan, K. Coot: model-building tools for molecular graphics. *Acta*
- 519 *Crystallographica Section D-Biological Crystallography* **60**, 2126-2132 (2004).
- 520

521 **ACKNOWLEDGEMENTS**

522           This work was supported by funds to J.F. from the National Institutes of Health (R01 GM  
523 55440 and GM 29169) and to R.L.G. from the National Institutes of Health (R01 GM 084288).  
524 K.C. was supported by an American Cancer Society Postdoctoral Fellowship (125201).

525

526 **AUTHOR CONTRIBUTIONS**

527           S.K., Z.F., K.C., B.C., M.S., R.L.G., and J.F. designed the research; K.C. prepared all of  
528 the biological reagents; S.K. and Z.F. performed the time-resolved cryo-EM experiments; S.K.,  
529 Z.F., and W.L. analyzed the data; S.K., K.C., R.L.G., and J.F. wrote the manuscript; all eight  
530 authors approved the final manuscript.

531

532 **COMPETING FINANCIAL INTERESTS**

533           The authors declare no conflicts of interest.

534 **FIGURE LEGENDS**

535 **Figure 1: Structural and time-resolved population analyses of the 50S subunit, 70S IC, and**  
536 **70S EC. (a)** The populations of the 50S subunit, 70S IC, and 70S EC at the 20 ms, 80 ms, 200  
537 ms, and 600 ms time points as obtained after 3D classification of the imaged particles. The error  
538 bars represent standard deviations obtained by repeating the 3D classification procedure three  
539 times for each time point. **(b-c)** The cryo-EM-derived Coulomb potential maps<sup>34</sup> of the (b) 70S IC  
540 and (c) 70S EC.

541

542 **Figure 2: Ribosome, IF, and fMet-tRNA<sup>fMet</sup> dynamics during 70S IC formation. (a-b)** Cryo-  
543 EM-derived Coulomb potential maps<sup>34</sup> viewed from the inter-subunit faces of (a) the 30S IC (with  
544 the 30S subunit shown in yellow) and (b) the 30S subunit (pale yellow), IF2, and fMet-tRNA<sup>fMet</sup>  
545 from the 70S IC. **(c)** Superposition of the 30S subunits of the 30S IC and the 70S IC and analysis  
546 of the conformations of the 30S subunit and IF1 (shown in magenta) from the 30S IC and the 50S  
547 subunit from the 70S IC. The analysis reveals that rapid dissociation of IF1 upon 50S subunit  
548 joining to the 30S IC relieves a potential steric clash between IF1 and the 50S subunit that would  
549 take place during 70S IC formation. **(d)** A magnified view of the superposition shown in panel (c)  
550 highlights the potential steric clash between turn 1 of IF1 and H69 of the 50S subunit. **(e)**  
551 Superposition of the 30S subunits from the 30S IC and the 70S IC and comparative analysis of  
552 the conformations of IF2 and fMet-tRNA<sup>fMet</sup> from the 30S IC (light purple and orange, respectively)  
553 and IF2 and fMet-tRNA<sup>fMet</sup> from the 70S IC (dark purple and green, respectively). The analysis  
554 reveals that DIV of IF2 moves towards the inter-subunit face of the 30S subunit by ~10 Å and, as  
555 it rearranges from its 30S P/I to its 70S P/I configuration, the central domain and 3' CCA-fMet tail  
556 of fMet-tRNA<sup>fMet</sup> move slightly towards tRNA exit (E) site of the 30S subunit upon 50S subunit  
557 joining to the 30S IC and formation of the 70S IC. **(f)** Superposition of the 30S subunits from the  
558 30S IC and the 70S IC and analysis of the conformations of IF2 from the 30S IC and uS12 (shown  
559 in pale yellow) of the 30S subunit of the 70S IC and H69, H71, H80, H89, and H95 (the sarcin-



560 ricin loop (SRL)) (shown in blue) of the 50S subunit of the 70S IC that interact with IF2. The  
561 analysis reveals that the IF2 rearrangements shown in panel (e) relieve a potential steric clash  
562 between dIV of IF2 and H89 that would take place during 70S IC formation.

563

564 **Figure 3: Ribosome and fMet-tRNA<sup>fMet</sup> dynamics during maturation of the 70S IC into a 70S**

565 **EC. (a)** Superposition of the 50S subunits from the 70S IC and 70S EC and comparative analysis  
566 of the conformations of the 30S subunit from the 70S IC (pale yellow) and the 30S subunit from  
567 the 70S EC (golden yellow). The analysis reveals that the ribosomal subunits from the 70S IC  
568 that is initially formed upon 50S subunit joining to the 30S IC transiently acquire a semi-rotated  
569 inter-subunit orientation and subsequently undergo an ~3° clockwise rotation, when viewed from  
570 the solution side of the 30S subunit, into the non-rotated inter-subunit conformation upon  
571 maturation of the 70S IC into a 70S EC. **(b)** Superposition of the 50S subunits from the 70S IC  
572 and 70S EC and comparative analysis of the conformations of fMet-tRNA<sup>fMet</sup> in the 70S P/I  
573 configuration from the 70S IC and fMet-tRNA<sup>fMet</sup> (green) in the P/P configuration from the 70S EC  
574 (red). The start codon of the mRNA is shown in pale pink. The analysis reveals the conformational  
575 rearrangements of fMet-tRNA<sup>fMet</sup> that take place as the 70S IC matures into a 70S EC. **(c)** A  
576 magnified view of the superposition shown in panel (b) reveals that the central domain of fMet-  
577 tRNA<sup>fMet</sup> moves by ~28 Å towards the P site. **(d)** A 180° rotation of the superposition shown in  
578 panel (c) highlights the untangling of the 3' CCA fMet tail of the fMet-tRNA<sup>fMet</sup> and its ~22 Å  
579 movement into the PTC.

580

581 **Figure 4: Structure-based kinetic model for late steps in bacterial translation initiation.**

582 Cartoon depicting the timing of structural and molecular events during late steps in bacterial  
583 translation initiation. Within the first ~20 ms after mixing 50S subunits and 30S ICs, 50S subunits  
584 (blue) reversibly join to the majority of 30S ICs (yellow) to form transient Pre-70S ICs. Conversion  
585 of the majority of these Pre-70S ICs into 70S ICs takes place within ~20-80 ms after mixing of

586 50S subunits and 30S ICs and begins with the rapid hydrolysis of GTP on IF2 (light purple). GTP  
587 hydrolysis is followed by the dissociation of IF1 (magenta), repositioning of dIV of IF2 (dark  
588 purple), and formation of IF2-ribosome interactions and inter-subunit bridges that stabilize the  
589 ribosome in its semi-rotated inter-subunit orientation and the fMet-tRNA<sup>fMet</sup> in its 70S P/I  
590 configuration. Within the next several hundred milliseconds, the majority of 70S ICs mature into  
591 70S ECs in a process that begins with release of P<sub>i</sub> from IF2 and dissociation of the GDP-form of  
592 IF2 from the 70S IC, events that enable rotation of the ribosomal subunits into their non-rotated  
593 inter-subunit orientation, rearrangement of fMet-tRNA<sup>fMet</sup> into its P/P configuration, untangling of  
594 the 3' CCA-fMet tail of fMet-tRNA<sup>fMet</sup>, and relocation of the fMet moiety of fMet-tRNA<sup>fMet</sup> into the  
595 PTC in preparation for formation of the first peptide bond upon delivery of the first aminoacyl-  
596 tRNA into the ribosomal aminoacyl-tRNA binding (A) site.  
597

598 **FIGURES**

599 **Figure 1**

600

601

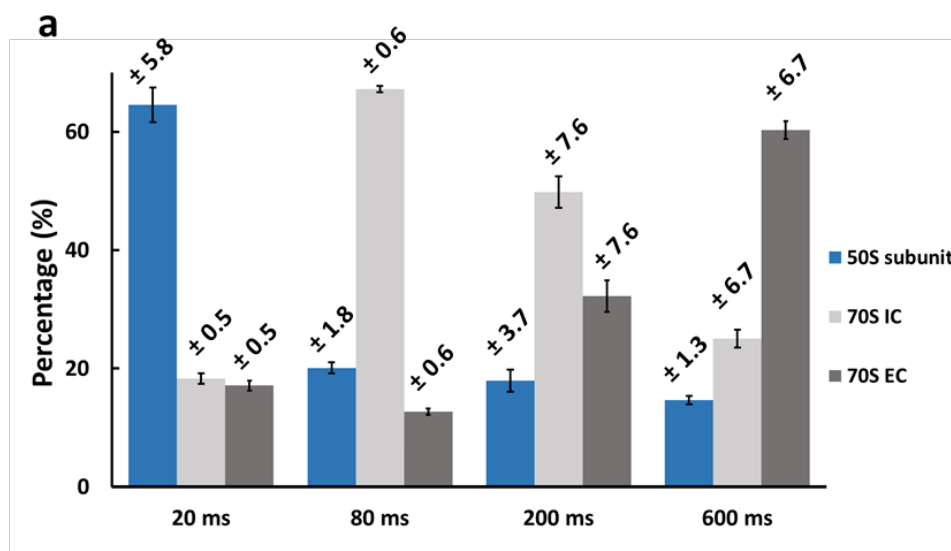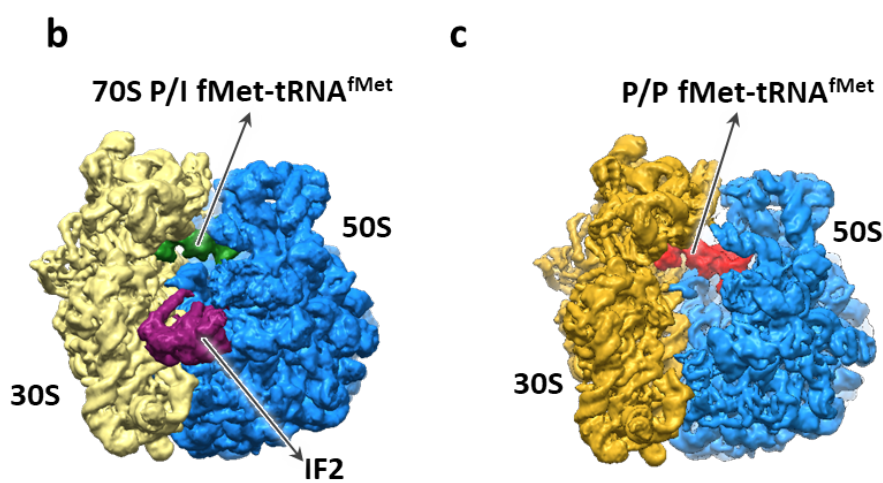

602

603 **Figure 2**

604

605

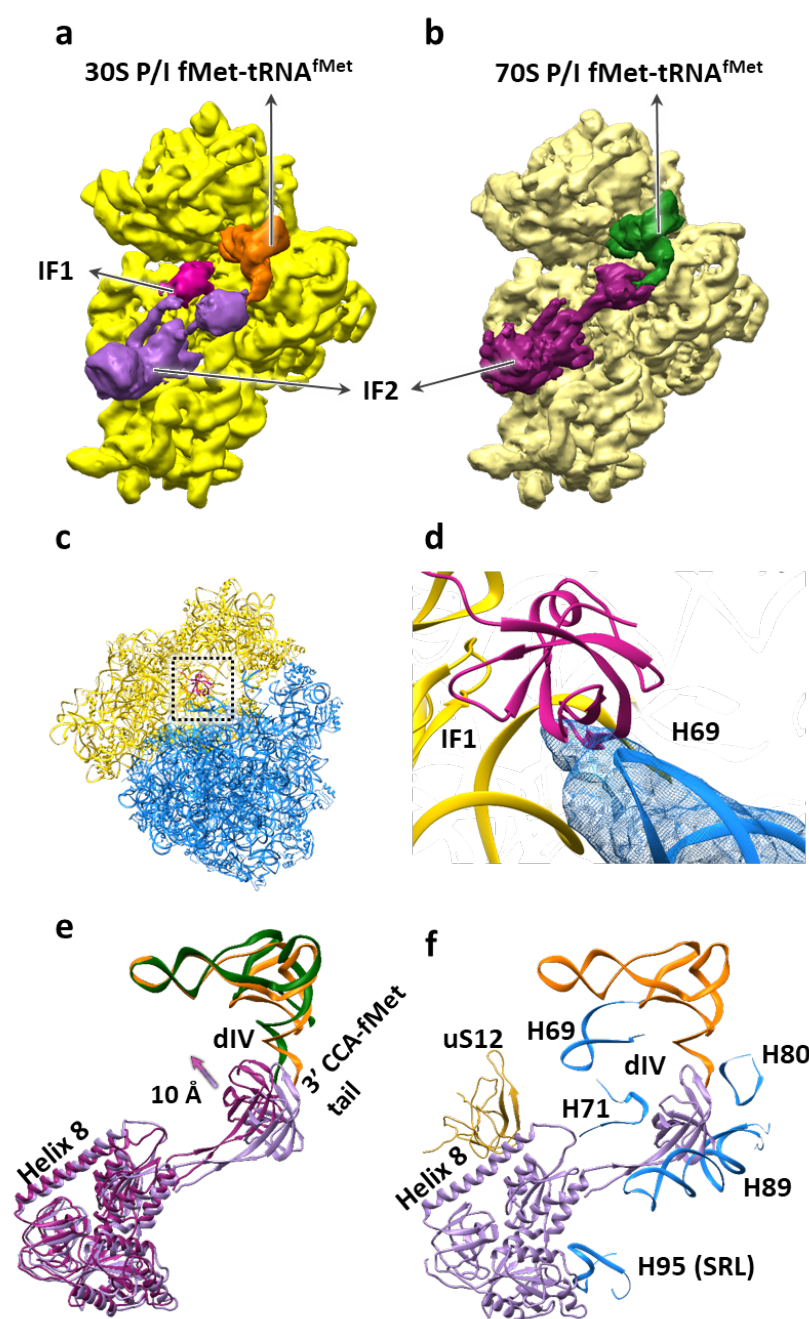

606

607 **Figure 3**

608

609

610

611

612

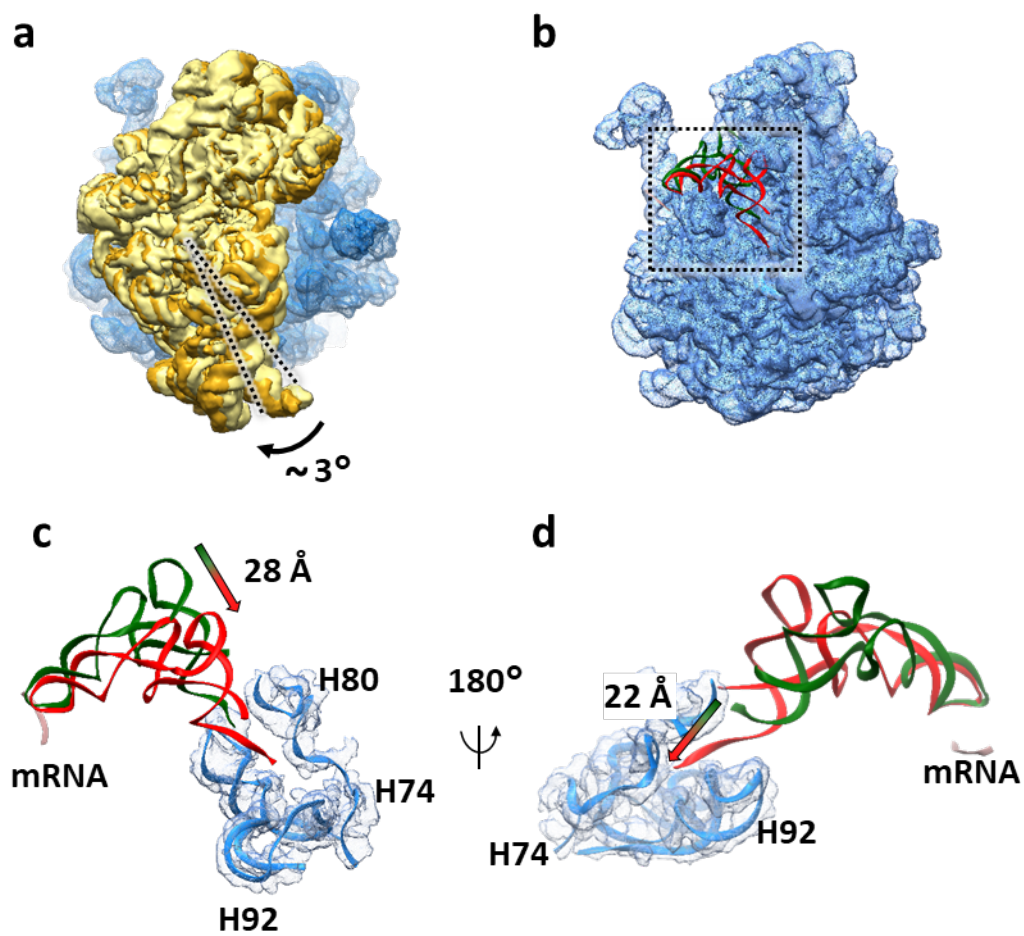

613

614 **Figure 4**

615

616

617

618

619

620

621

622

623

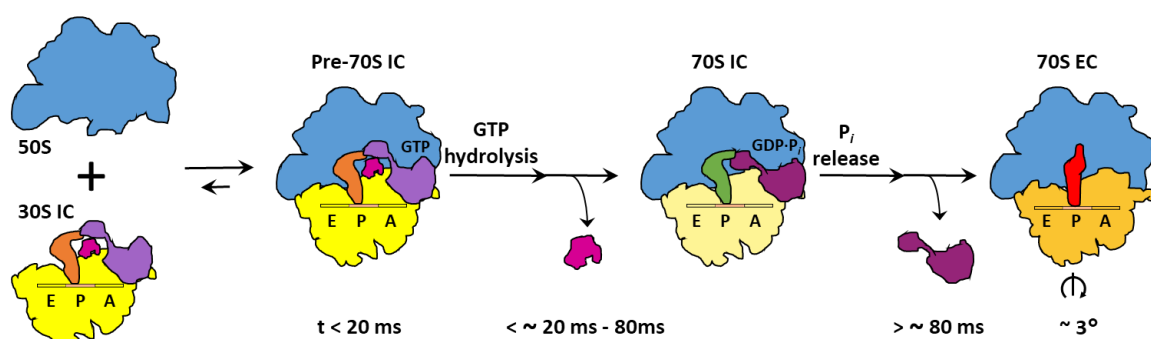

624

625 **TABLES**

626 **Table 1.** Populations of the 50S subunit, 70S IC, and 70S EC obtained after 3D classification.

627 Standard deviations were obtained by repeating the 3D classification procedure three times for

628 each time point.

|               | <b>50S (%)</b> | <b>70S IC (%)</b> | <b>70S EC (%)</b> |
|---------------|----------------|-------------------|-------------------|
| <b>20 ms</b>  | 64.6 ± 5.8     | 18.3 ± 0.5        | 17.1 ± 0.5        |
| <b>80 ms</b>  | 20.1 ± 1.8     | 67.2 ± 0.6        | 12.7 ± 0.6        |
| <b>200 ms</b> | 18.0 ± 3.7     | 49.8 ± 7.6        | 32.2 ± 7.6        |
| <b>600 ms</b> | 14.7 ± 1.4     | 25.1 ± 6.7        | 60.3 ± 6.7        |

629
